# Supplementary material
Source: PubMed Central journal article supplement (PMC3100606)

**Supplemental Figure 1. Localization of Lef1, AR, p63 and Ki67 in E17.5 murine urogenital sinus**

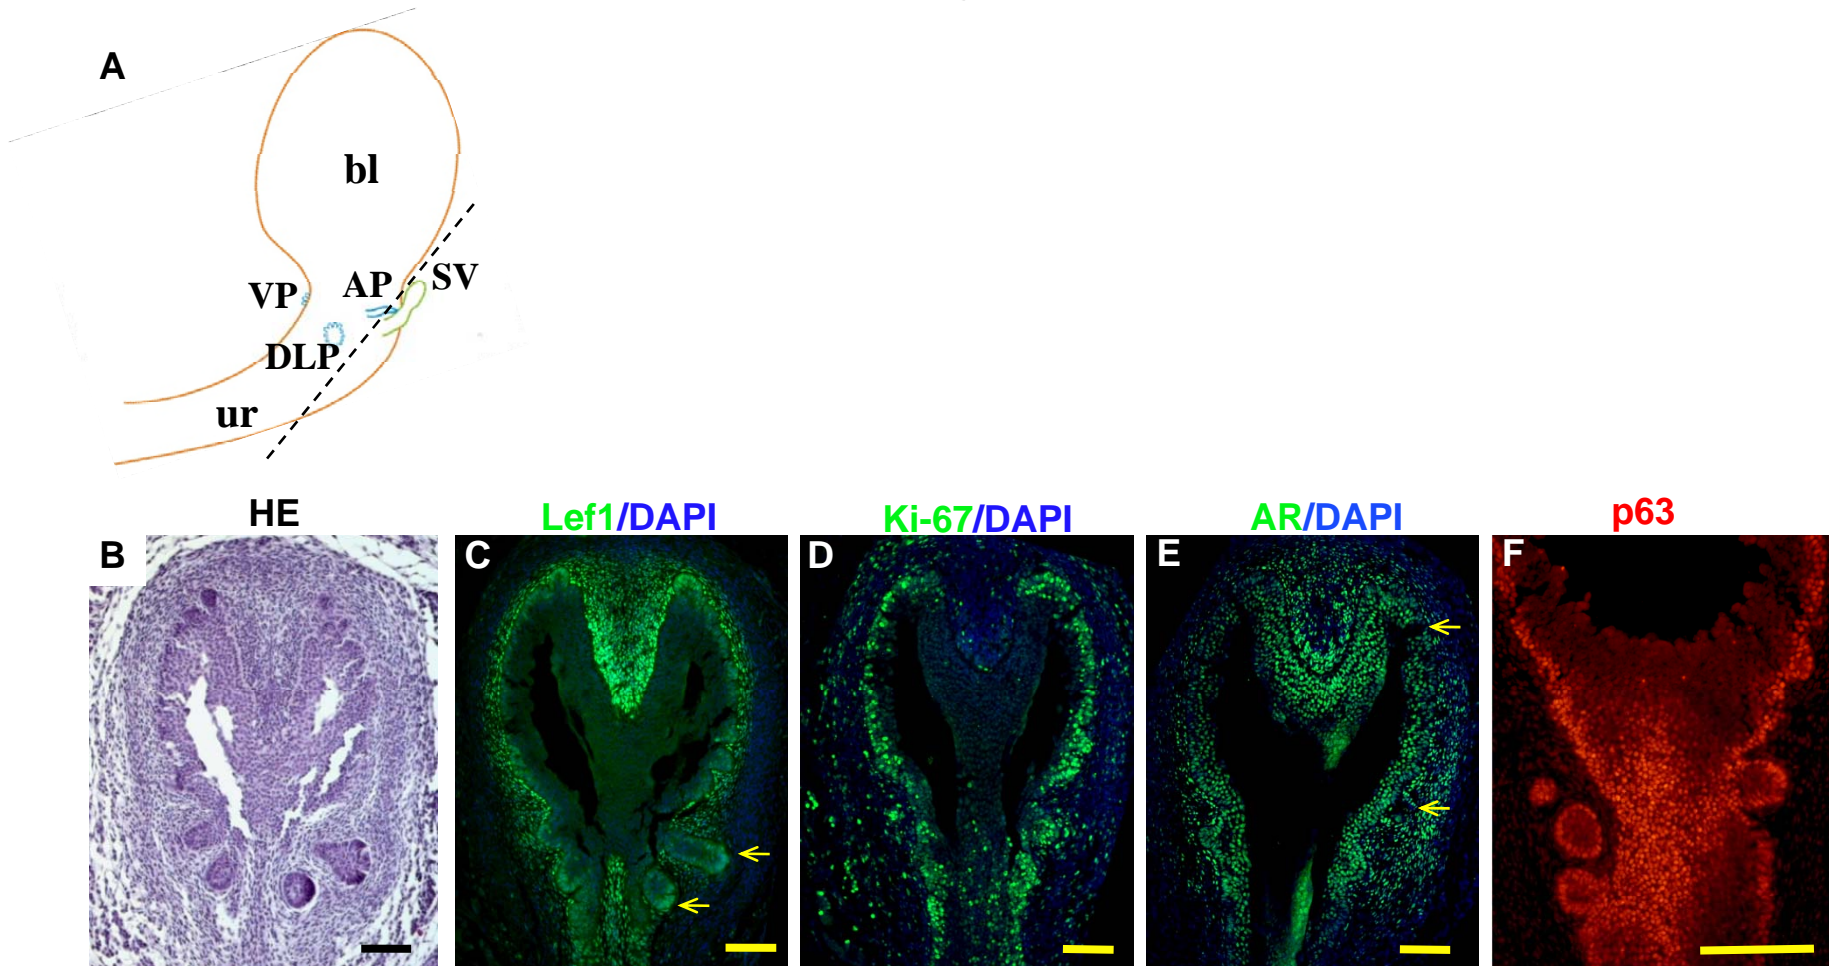

Supplemental Figure 2. Localization of Lef1 in P28 prostate

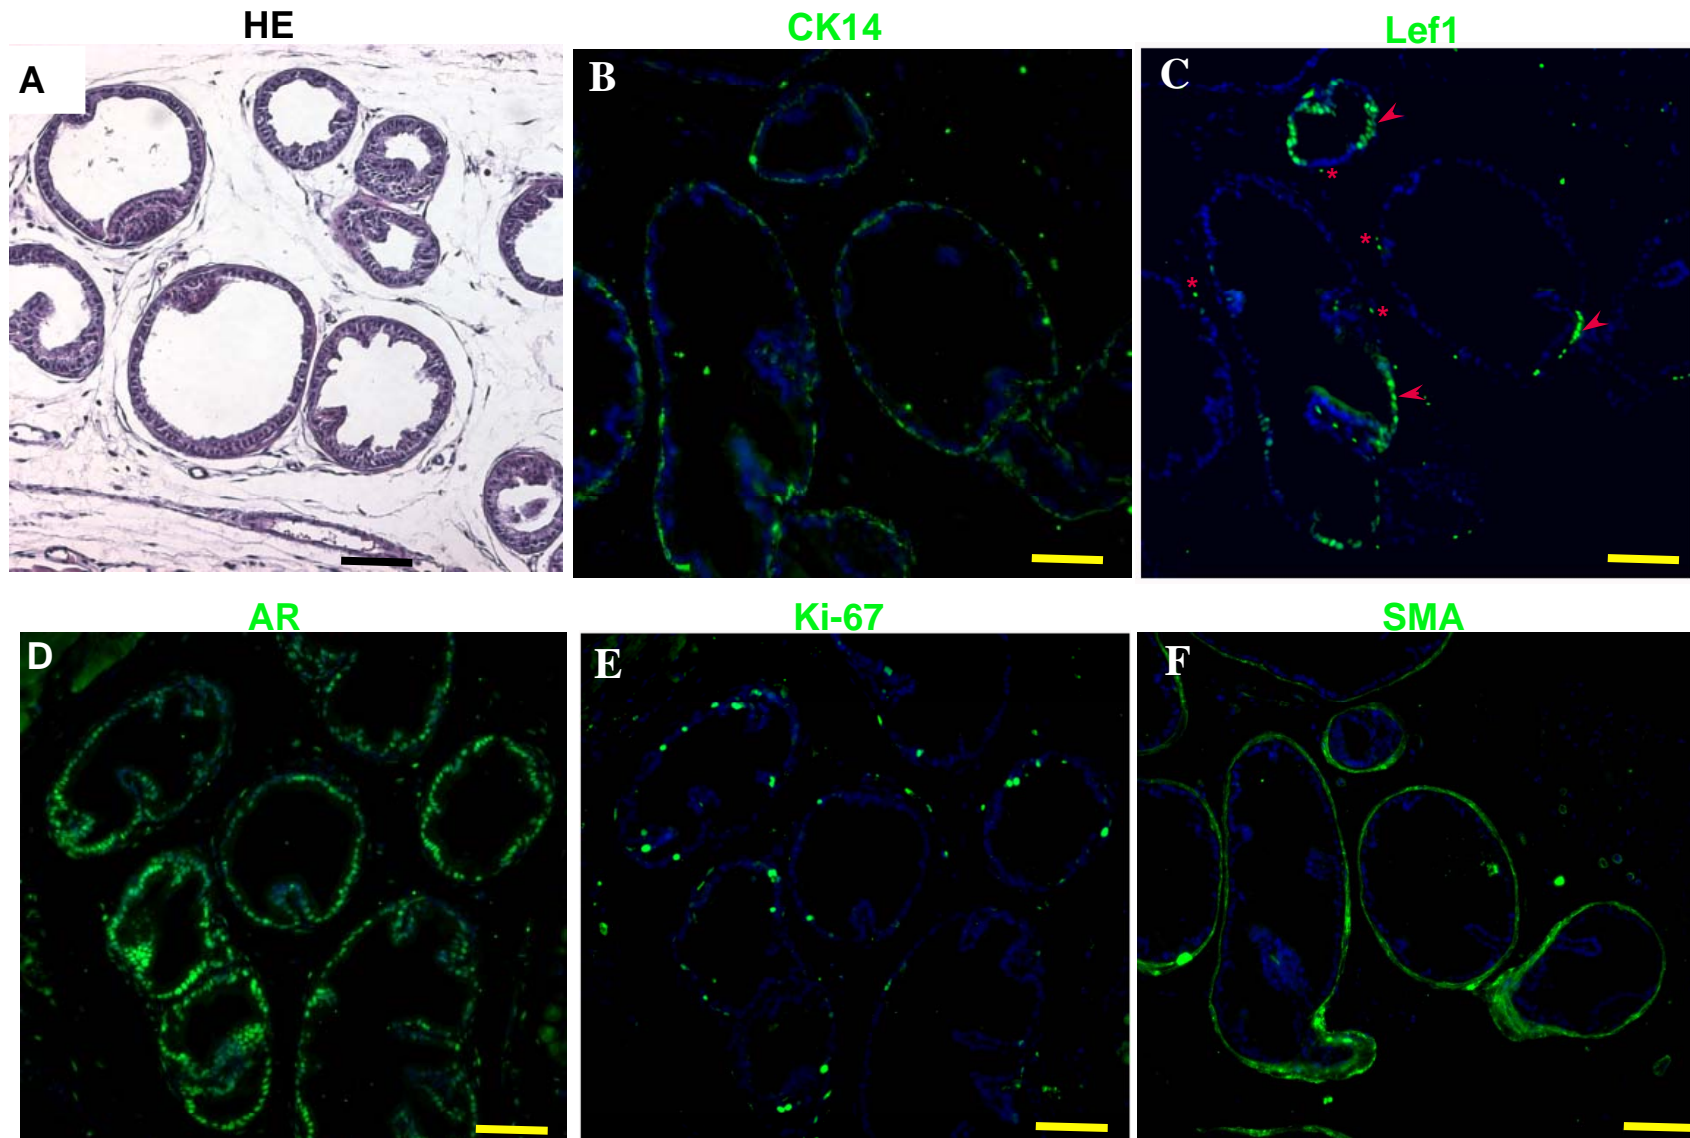

**Supplemental Figure 3. Flow cytometry analysis for Lef1 in 3 month old ventral prostates**

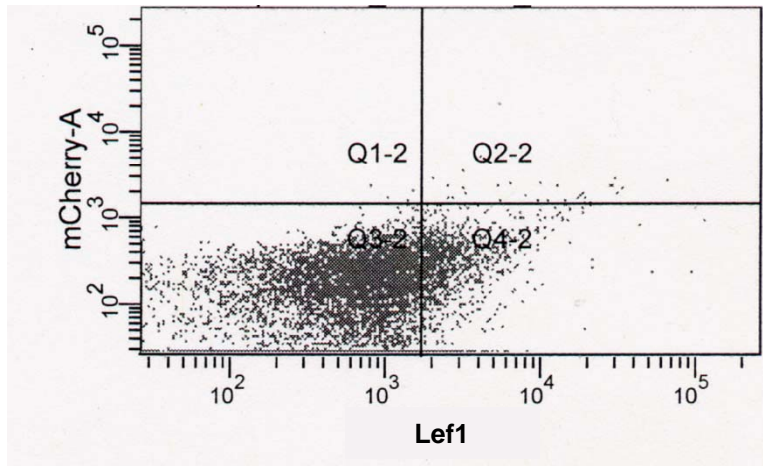

Supplemental Figure 4.

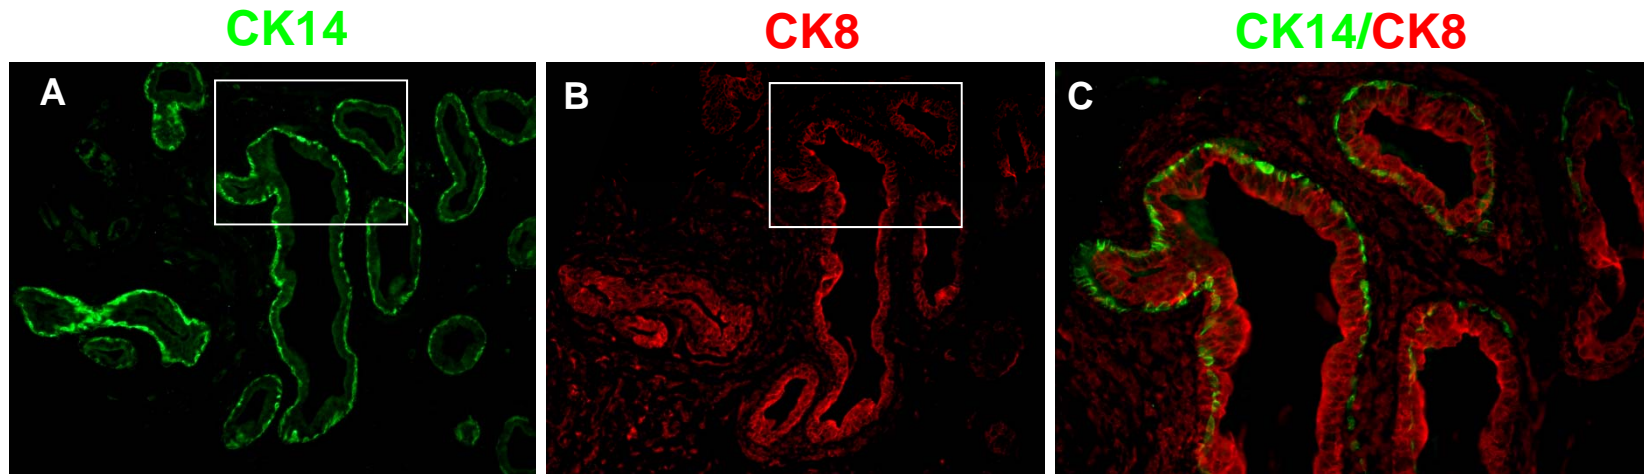

Supplement: supp_me.2010-0513_me-10-0513_Figs_1-4.pdf [file supp_me.2010-0513_me-10-0513_Figs_1-4.pdf]
